# Supplementary material
Source: publisher figshare collection journal article supplement (https://sage.figshare.com/ndownloader/files/19497206)
Supplement: Supplementary file 1 [file 19497206]

## **Appendix 1**

### **Peri-operative drug dosing in class III obese surgical patients - a survey of Anaesthetists**

#### **Demographic Information**

**State/Territory:**

ACT / NSW / NT / New Zealand / QLD / SA / TAS / VIC / WA

**What is your Professional Designation?**

Specialist / Trainee

**How many years have you been practising anaesthesia?**

\_\_\_\_\_ (Numerical Value)

**Where do you spend the majority of your clinical time?**

Private / Public / Equal in both settings

**What is your work routine?**

Full Time / Part-time

**Please estimate what proportion of your patients in the last 4 weeks have had a BMI  $\geq 40$  kg/m<sup>2</sup>?**

Up to one third / More than one third

## **Dosing Practices**

**When anaesthetising patients with a BMI  $\geq 40$  kg/m<sup>2</sup> (and no other significant comorbidities), what dosing strategy would you normally use for the following drugs?**

Total Body Weight (TBW) = weight in kilograms

Lean Body Weight (LBW) = TBW minus body fat weight

Ideal Body Weight (IBW) = Weight corrected for sex, height and frame size

Adjusted/Corrected Body Weight (ABW/CBW) = Correction factor of excess weight above IBW added to IBW

|                                                                                |                   |                  |                          |                            |
|--------------------------------------------------------------------------------|-------------------|------------------|--------------------------|----------------------------|
| <b>Propofol (For IV induction)</b>                                             | Total body weight | Lean body weight | My own practice(specify) | NA (Don't use in practice) |
| <b>Propofol (For TIVA)</b>                                                     | Total body weight | Lean body weight | My own practice(specify) | NA (Don't use in practice) |
| <b>Atracurium</b>                                                              | Total body weight | Lean body weight | My own practice(specify) | NA (Don't use in practice) |
| <b>Cisatracurium</b>                                                           | Total body weight | Lean body weight | My own practice(specify) | NA (Don't use in practice) |
| <b>Rocuronium (Not for RSI)</b>                                                | Total body weight | Lean body weight | My own practice(specify) | NA (Don't use in practice) |
| <b>Suxamethonium</b>                                                           | Total body weight | Lean body weight | My own practice(specify) | NA (Don't use in practice) |
| <b>Sugammadex (For rocuronium reversal when TOF count <math>\geq 2</math>)</b> | Total body weight | Lean body weight | My own practice(specify) | NA (Don't use in practice) |
| <b>Morphine</b>                                                                | Total body weight | Lean body weight | My own practice(specify) | NA (Don't use in practice) |
| <b>Fentanyl</b>                                                                | Total body weight | Lean body weight | My own practice(specify) | NA (Don't use in practice) |
| <b>Remifentanyl</b>                                                            | Total body weight | Lean body weight | My own practice(specify) | NA (Don't use in practice) |
| <b>Alfentanil</b>                                                              | Total body weight | Lean body weight | My own practice(specify) | NA (Don't use in practice) |

**If you selected “my own practice”, please provide details in the comment box for the specific drug.**

## **Clinical Difficulties**

**In patients with BMI  $\geq 40$  kg/m<sup>2</sup>, have you observed any increased frequency of the following complications compared to non-obese patients (BMI < 30 kg/m<sup>2</sup>)?**

|                                                                                                                |     |    |
|----------------------------------------------------------------------------------------------------------------|-----|----|
| <b>Inadequate paralysis for intubation under general anaesthesia (requiring extra muscle relaxant dosing)?</b> | Yes | No |
| <b>Hypoxic events in recovery due to inadequate reversal?</b>                                                  | Yes | No |
| <b>Hypoxic events in recovery due to narcosis?</b>                                                             | Yes | No |
| <b>Post-operative hypoxic problems on wards (such as due to obesity hypoventilation syndrome)</b>              | Yes | No |

## **Resources**

**Do you use any information resources to assist you in dosing patients with BMI  $\geq 40$  kg/m<sup>2</sup>?**

**(select one or more):**

- |                                              |                                 |
|----------------------------------------------|---------------------------------|
| 1. Internal hospital/departmental guidelines | 2. Drug dosing phone apps       |
| 3. Australian Medicines Handbook             | 4. Therapeutic guidelines (eTG) |
| 5. Journal reading                           | 6. Colleagues                   |
| 7. Nil                                       | 8. Other (Specify) _____        |
